# Supplementary material for: Gating the conductance of extended metal atom chains: a computational analysis of Ru3(dpa)4(NCS)2 and [Ru3(npa)4(NCS)2]
Source: Royal Society of Chemistry journal article supplement (doi:10.1039/d1cp02429a), 2021-01-01
Supplement: d1cp02429a1.pdf [file d1cp02429a1.pdf]

## Gating the Conductance of Extended Metal Atom Chains: a Computational Analysis of $\text{Ru}_3(\text{dpa})_4(\text{NCS})_2$ and $[\text{Ru}_3(\text{npa})_4(\text{NCS})_2]$

Mariano Spivak<sup>a,b,§</sup>, Coen de Graaf<sup>b,c</sup>, Vaida Arcisauskaite<sup>a</sup> and Xavier López<sup>b\*</sup>

<sup>a</sup> *Department of Chemistry, University of Oxford, South Parks Road, Oxford OX1 3QZ, UK.*

<sup>b</sup> *Universitat Rovira I Virgili, Departament de Química Física i Inorgànica, Marcel·lí Domingo 1, 43007 Tarragona, Spain.*

<sup>c</sup> *Institució Catalana de Recerca i Estudis Avançats (ICREA), Passeig Lluís Companys 23, 08010 Barcelona, Spain.*

*Present address:*

*§ Beckman Institute for Advanced Science and Technology, University of Illinois at Urbana-Champaign, 405 N. Mathews Avenue, Urbana, Illinois 61801, USA.*

### Supporting Information

#### List of contents:

**Table S1.** Effect of the relativistic effects —scalar or spin-orbit coupling— on the electronic structure of the EMAC system  $\mathbf{2}^+$  and for a model system composed of one Ru center and its environment,  $\text{RuCa}(\text{Py})_4(\text{NCS})_2^{3+}$ .

**Figure S1.** Molecular projected self-consistent Hamiltonian (MPSH) eigenvalues (left) and transmission spectra (right) and for  $\text{Ru}_3(\text{dpa})_4(\text{NCS})_2$  ( $\mathbf{1}$ ) as a function of gate voltage.

**Figure S2.** Device configuration with species  $\mathbf{2}$  and an heteroatom ( $X = \text{Na}, \text{Cl}$ ).

**Figure S3.** Calculated transmission spectra for dpa and npa systems with additional Na or Cl atoms located in the unit cell.

**Figure S4.** Calculated current vs. the applied voltage for compound  $\mathbf{2}^*$ , the 2:2 isomer of  $\mathbf{2}$ .

**Table S1.** Effect of the relativistic effects —scalar or spin-orbit coupling— on the electronic structure of the EMAC system  $\mathbf{2}^+$ . Listed are the computed LUMO and HOMO– $n$  energies (in eV, higher energies first) for  $\text{Ru}_3(\text{npa})_4(\text{NCS})_2^+$  ( $\mathbf{2}^+$ ) and for a model system composed of one Ru center and its environment based on the real EMAC system, i.e.  $\text{RuCa}(\text{Py})_4(\text{NCS})^{3+}$ . The absolute energies of the latter case must not be compared to the full system because of the molecular charge difference.

Calculation details: B3LYP functional, all-electron TZP basis set, single point runs.

| System                                                       | Scalar effects | Spin-orbit coupling | Orbital |
|--------------------------------------------------------------|----------------|---------------------|---------|
| $\text{Ru}_3(\text{npa})_4(\text{NCS})_2^+$<br>( $S = 1/2$ ) | –6.712         | –6.502              | LUMO    |
|                                                              | –7.755         | –7.836              | HOMO    |
|                                                              | –7.825         | –7.862              | HOMO–1  |
|                                                              | –7.849         | –7.912              | HOMO–2  |
|                                                              | –7.874         | –7.975              | HOMO–3  |
| $\text{RuCa}(\text{Py})_4(\text{NCS})^{3+}$<br>( $S = 1$ )   | –13.968        | –13.986             | LUMO    |
|                                                              | –15.036        | –15.082             | HOMO    |
|                                                              | –15.322        | –15.336             | HOMO–1  |
|                                                              | –15.487        | –15.468             | HOMO–2  |
|                                                              | –15.554        | –15.595             | HOMO–3  |

A)

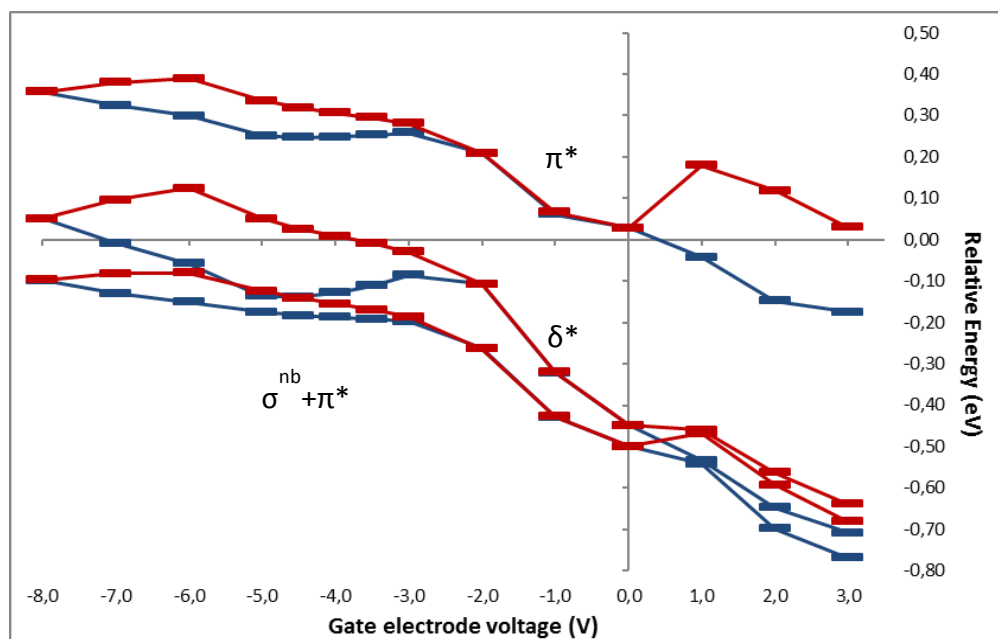

B)

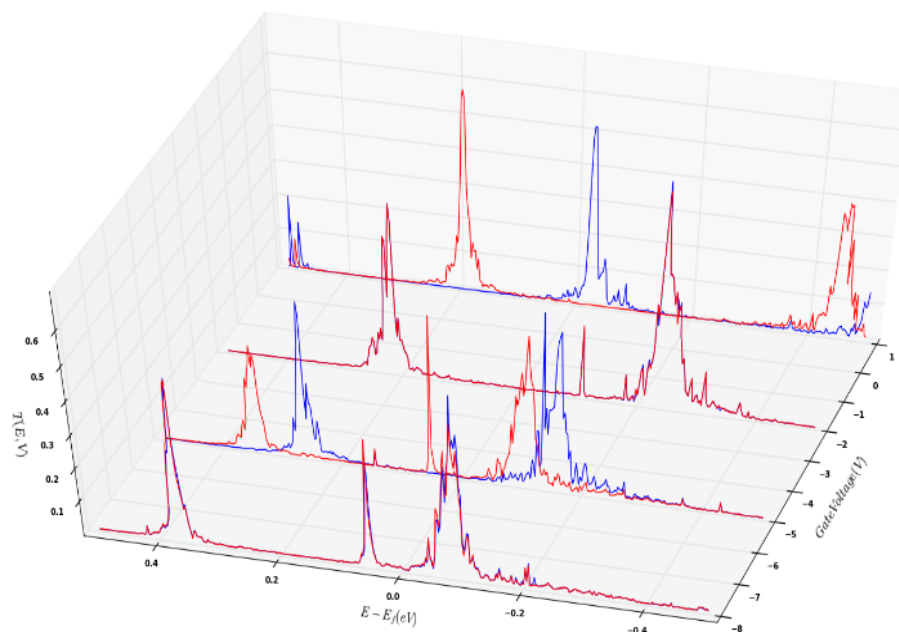

**Figure S1.** A) Molecular projected self-consistent Hamiltonian (MPSH) eigenvalues (left) and B) transmission spectra (right) and for  $\text{Ru}_3(\text{dpa})_4(\text{NCS})_2$  (**1**) as a function of gate voltage.

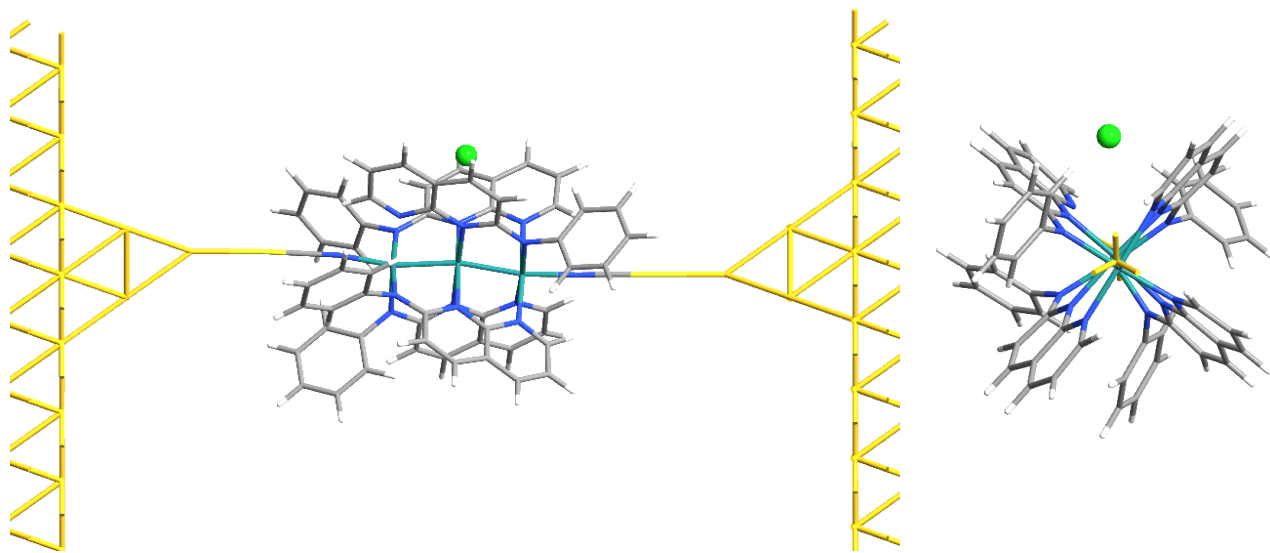

**Figure S2.** Device configuration with species **2** and the heteroatom ( $X = \text{Na}, \text{Cl}$  as a green sphere) with perpendicular (left) and parallel (right) views to the chain.

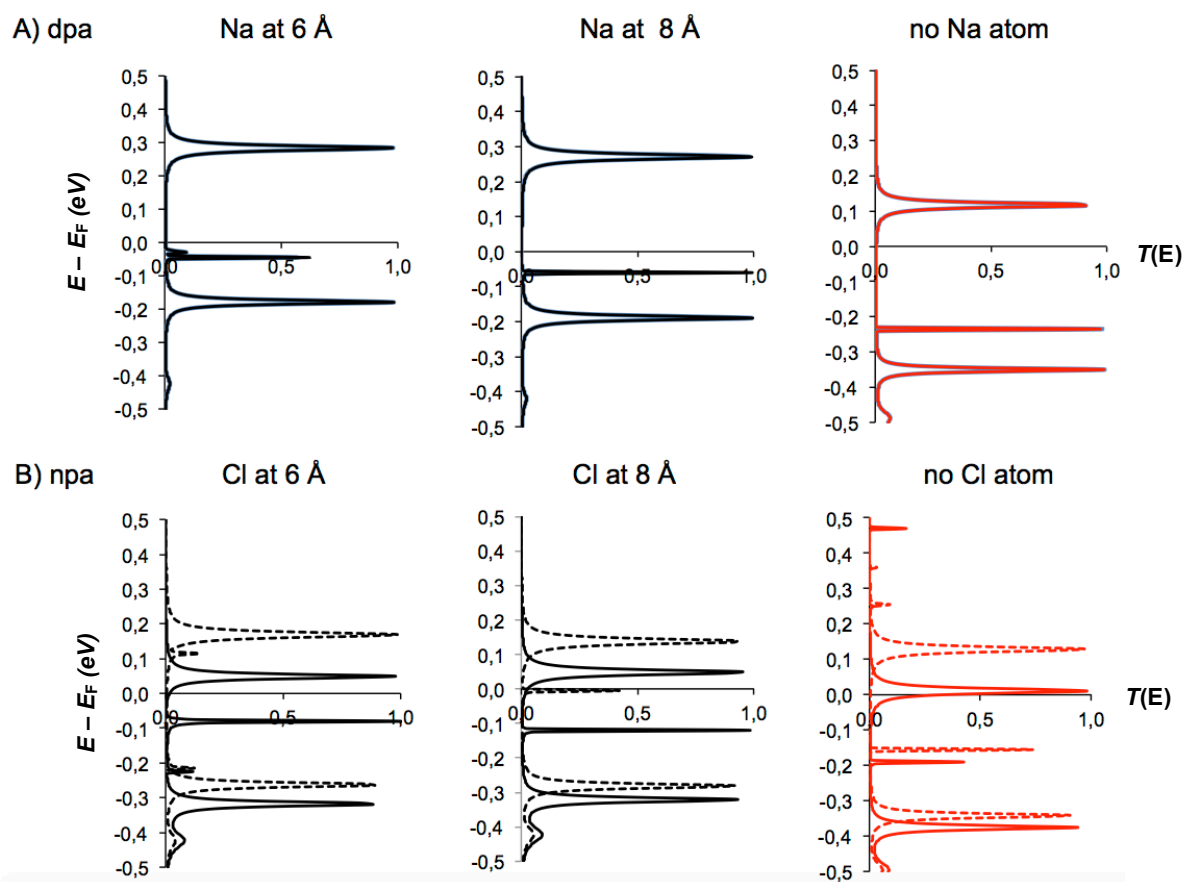

**Figure S3.** Calculated transmission spectra for A) the dpa and B) the npa systems with additional Na or Cl atoms located in the unit cell at different distances from the EMAC molecule (black curves). The red curves to the right represent the situation without the extra atoms in the cell.

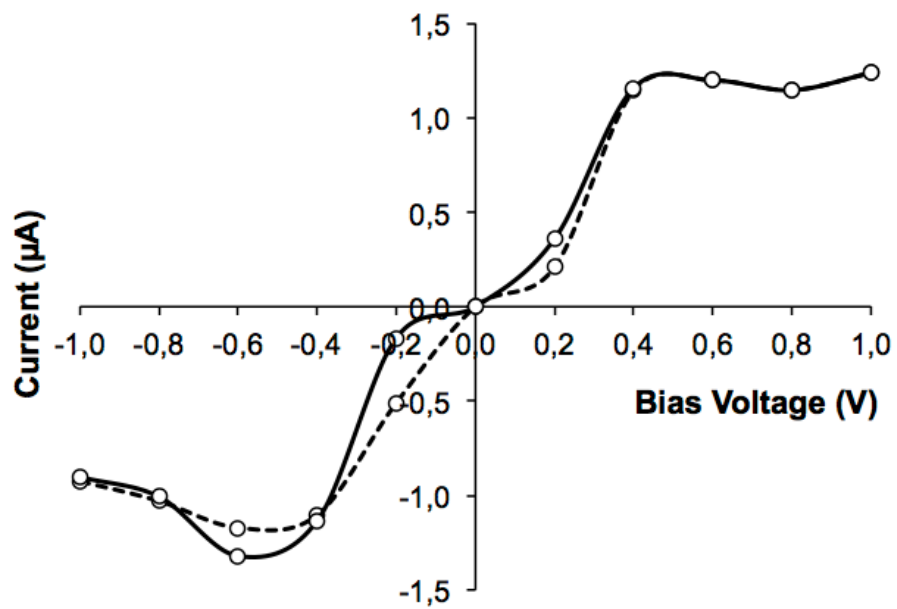

**Figure S4.** Calculated current ( $\mu\text{A}$ ) as a function of the applied voltage (V) for compound **2\***, the 2:2 isomer of **2**. Solid and blue lines denote spin- $\alpha$  and spin- $\beta$  contributions.
